# 1 SHERRY2: A method for rapid and sensitive single cell

## 2 RNA-seq

3

4 Lin Di,<sup>1,2,3,4,#</sup> Bo Liu,<sup>5,6,#</sup> Yuzhu Lyu,<sup>1</sup> Shihui Zhao,<sup>2,7</sup> Yuhong Pang,<sup>2</sup> Chen  
5 Zhang,<sup>1</sup> Jianbin Wang,<sup>8,\*</sup> Hai Qi,<sup>5,6\*</sup> Jie Shen,<sup>1,\*</sup> Yanyi Huang<sup>2,4,9,10,\*</sup>

6

7 <sup>1</sup> School of Basic Medical Sciences, Beijing Key Laboratory of Neural  
8 Regeneration and Repair, Advanced Innovation Center for Human Brain  
9 Protection, Capital Medical University, Beijing 100069, China

10 <sup>2</sup> Biomedical Pioneering Innovation Center, Beijing Advanced Innovation  
11 Center for Genomics, Peking University, Beijing 100871, China

12 <sup>3</sup> School of Life Sciences, Peking University, Beijing 100871, China

13 <sup>4</sup> Institute for Cell Analysis, Shenzhen Bay Laboratory, Guangdong 528107,  
14 China

15 <sup>5</sup> Laboratory of Dynamic Immunobiology, Institute for Immunology, Tsinghua  
16 University, Beijing 100871, China

17 <sup>6</sup> Department of Basical Medical Sciences, School of Medicine, Tsinghua  
18 University, Beijing 100871, China

19 <sup>7</sup> Peking University–Tsinghua University–National Institute of Biological  
20 Sciences Joint Graduate Program (PTN), Peking University, Beijing 100871,  
21 China

22 <sup>8</sup> School of Life Sciences, Beijing Advanced Innovation Center for Structural  
23 Biology, Tsinghua University, Beijing 100084, China

24 <sup>9</sup> College of Chemistry and Molecular Engineering, Beijing National  
25 Laboratory for Molecular Sciences, Peking University, Beijing 100871, China

26 <sup>10</sup> Peking-Tsinghua Center for Life Sciences, Peking University, Beijing  
27 100871, China

28

29 # These authors contributed equally.

30 \* Corresponding authors: [yanyi@pku.edu.cn](mailto:yanyi@pku.edu.cn) (Y.H.), [shenjie@ccmu.edu.cn](mailto:shenjie@ccmu.edu.cn)  
31 (J.S.), [qihai@tsinghua.edu.cn](mailto:qihai@tsinghua.edu.cn) (H.Q.) and [jianbinwang@tsinghua.edu.cn](mailto:jianbinwang@tsinghua.edu.cn) (J.W.)

32

33

## 34 Abstract

35 Many single cell RNA-seq applications aim to probe a wide dynamic range of  
36 gene expression, but most of them are still challenging to accurately quantify  
37 low-abundance transcripts. Based on our previous finding that Tn5  
38 transposase can directly cut-and-tag DNA/RNA hetero-duplexes, we present  
39 SHERRY2, an optimized protocol for sequencing transcriptomes of single cells

40 or single nuclei. SHERRY2 is robust and scalable, and it has higher sensitivity  
41 and more uniform coverage in comparison with prevalent scRNA-seq methods.  
42 With throughput of a few thousand cells per batch, SHERRY2 can reveal the  
43 subtle transcriptomic differences between cells and facilitate important  
44 biological discoveries.

45

## 46 **Introduction**

47 Many experimental methods for transcriptome profiling by next generation  
48 sequencing (RNA-seq) have been developed to cover various scales of input  
49 samples, ranging from bulk samples<sup>1,2</sup> to single cells<sup>3-5</sup> or even subcellular  
50 components<sup>6,7</sup>. High quality single-cell RNA-seq (scRNA-seq) data can be used  
51 to reveal the kinetic details of gene expression and transitions between cell  
52 states or types<sup>8-10</sup>. Prevalent scRNA-seq methods mainly rely on template  
53 switching and pre-amplification of complementary DNA (cDNA). However,  
54 large-scale scRNA-seq techniques, commonly operated in micro-droplets or  
55 wells, have relatively low sensitivity.<sup>11</sup> Single-tube based scRNA-seq  
56 approaches can typically produce higher coverage for low-abundance genes,  
57 but they still suffer from quantification bias due to insufficient reverse  
58 transcription and GC imbalance during amplification. Besides, their complex  
59 experimental methods are generally unsuitable for large-scale studies.

60 We have reported a highly reproducible and rapid library preparation  
61 method for RNA-seq, SHERRY, which can be applied to minute amount of RNA  
62 samples<sup>12</sup>. The development of SHERRY was based on the recent discovery  
63 that Tn5 transposase can bind and cut RNA/DNA hetero-duplexes directly. With  
64 slight modifications, SHERRY could also be applied to various clinical  
65 metatranscriptome applications, such as identification of SARS-CoV-2 and  
66 other pathogens<sup>13</sup>.

67 Although SHERRY was applied to process single cells and achieved less  
68 biased quantification of gene expression in comparison with other scRNA-seq  
69 methods, the results still exhibited clear coverage bias toward the 3'-ends of  
70 transcripts, relatively low sensitivity, and low tolerance to endogenous DNA. In  
71 this work, we present an optimized method, SHERRY2, which addresses the  
72 limitations of SHERRY and is fully compatible with single cells and single nuclei  
73 with low RNA content. In comparison with prevalent RNA-seq methods,  
74 SHERRY2 showed higher sensitivity, better concordance with reference data,  
75 greater reproducibility between replicates, and superior scalability, allowing the  
76 method to be used to process a few thousand single cells per batch and thus  
77 reducing the time required to conduct experiments.

78

## 79 Results

### 80 SHERRY2 provides high sensitivity and even coverage across gene 81 bodies for scRNA-seq.

82 For scRNA-seq, both RNA degradation and incompleteness of reverse  
83 transcription (RT) are major factors that reduce gene detection sensitivity and  
84 coverage evenness. Although adding random RT primers facilitates the  
85 coverage of long transcripts, it requires removal of ribosomal RNA, which is  
86 incompatible with scRNA-seq<sup>13</sup>. Spiking template-switching oligonucleotides  
87 also provides more uniform coverage, but this strategy has limited detection  
88 sensitivity and specificity<sup>12</sup>.

89 We altered various experimental parameters of the original SHERRY  
90 protocol for both bulk and single cell inputs (**Extended Data Fig. 1, 3**). To  
91 protect RNA from degradation, we lowered the concentration of free Mg<sup>2+</sup>,  
92 either by reducing the amount of total Mg<sup>2+</sup> or adding more dNTP to chelate  
93 Mg<sup>2+</sup> ions<sup>14</sup>, and observed significant improvement of the coverage evenness  
94 of RNA-seq. To facilitate cDNA synthesis, we screened different reverse  
95 transcriptases and found that SuperScript IV (SSIV), working at a relatively high  
96 temperature with a low Mg<sup>2+</sup> concentration, could better overcome the  
97 secondary structure of RNA and hence simultaneously enhanced the sensitivity  
98 and uniformity of RNA-seq.

99 When RNA-seq was conducted using pictogram-level RNA inputs, sufficient  
100 amount of Tn5 transposome was important for high sensitivity, and Bst 3.0 DNA  
101 polymerase filled the gap left by Tn5 tagmentation more effectively than other  
102 enzymes. The protocol was insensitive to many experimental conditions,  
103 including the usage of single strand DNA binding proteins<sup>15</sup>, Tn5 inactivation,  
104 the concentration of extension polymerase, and the usage of hot-start  
105 polymerase.

106 We named the optimized SHERRY protocol SHERRY2. Using RNA  
107 extracted from HEK293T cells as input, we compared the performance of  
108 SHERRY2 and the original SHERRY protocol. At the 10-ng level (**Extended  
109 Data Fig. 2**), both protocols identified more than 11,000 genes at saturation. At  
110 the 100-pg level, SHERRY2 performed better than SHERRY and detected 5.0%  
111 more genes at 0.6-million reads. In addition, SHERRY2 greatly diminished 3'-  
112 end coverage bias and increased the unique mapping rate for 10-ng and 100-  
113 pg inputs. We also constructed a bias-free RNA-seq library using 200-ng total  
114 RNA input via the conventional fragmentation-and-ligation method with the  
115 NEBNext E7770 kit (NEBNext). For 100-pg input, the gene overlap between  
116 NEBNext and SHERRY2 was greater than that between NEBNext and  
117 SHERRY (81.7% vs 78.4%), and the gene expression results of NEBNext and  
118 SHERRY2 were also more closely correlated (R=0.70 vs R=0.65).

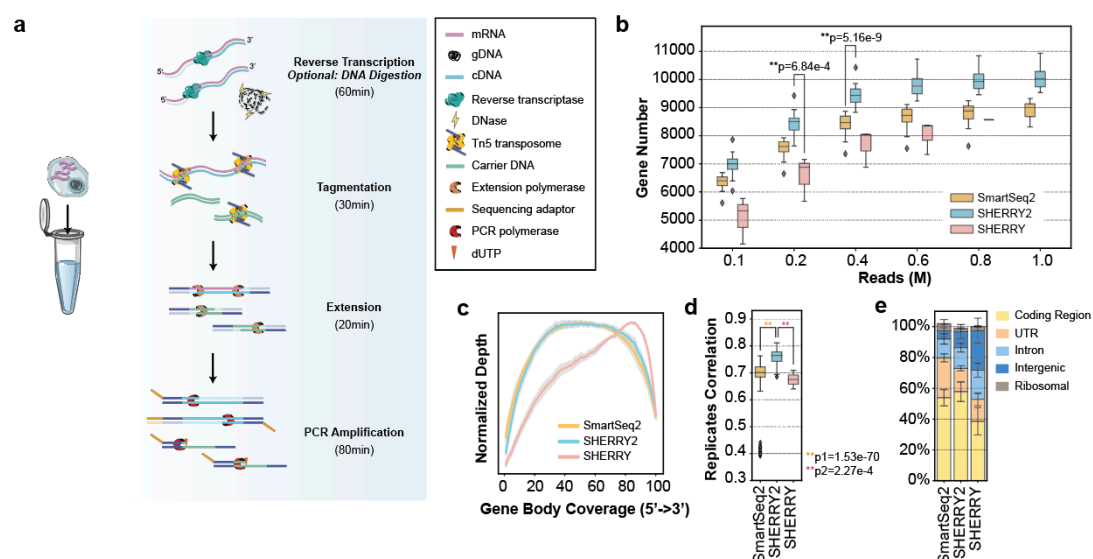

119

120 **Fig 1. The workflow and general performance of SHERRY2 on single cell RNA-**  
 121 **seq. a**, The workflow of SHERRY2 for scRNA-seq. Poly(A) tailed RNA is firstly  
 122 released from single cells and reverse transcribed. The resulting RNA/cDNA hetero-  
 123 duplex is then tagmented by Tn5 transposome, followed by gap-repair and indexed  
 124 PCR. Optionally, chromatin can be digested during lysis. The entire protocol is  
 125 performed in one tube and takes 3 hours. **b**, Gene number (FPKM>1) with  
 126 SmartSeq2, SHERRY2 and SHERRY when subsampling reads to 0.1, 0.2, 0.4, 0.6,  
 127 0.8 and 1 million reads. **c**, Gene body coverage detected by the three scRNA-seq  
 128 protocols. The gray region represents the standard deviation of the normalized depth  
 129 among replicates. **d**, Pairwise correlation of gene expression within replicates for the  
 130 three scRNA-seq protocols. The correlation R-value was calculated by a linear fitting  
 131 model with normalized counts of overlapped genes. **e**, Components of reads that  
 132 were mapped to different regions of the genome using the three scRNA-seq  
 133 protocols. The error bars show the standard deviation. The samples in **b-e** are single  
 134 HEK293T cells. The p-values in **b** and **d** were calculated by the Mann-Whitney-U  
 135 test.

136

137 The SHERRY2 protocol for scRNA-seq contains only four steps: reverse  
 138 transcription, Tn5 tagmentation, gap-filling through extension, and PCR  
 139 amplification. The entire SHERRY2 protocol can be completed within 3 hours,  
 140 whereas the original SHERRY protocol requires 4 hours, and other high-  
 141 sensitivity scRNA-seq method such as SmartSeq2 may require much more  
 142 time to be completed<sup>3</sup> (**Fig. 1a**). The one-tube workflow of SHERRY2 is readily  
 143 scalable to high-throughput applications. SHERRY2 was able to detect 10,024  
 144 genes (FPKM >1) within a single HEK293T cell at 1-million reads. When  
 145 subsampling to 0.2-million reads, SHERRY2 still detected 8,504 genes, which  
 146 was 1,622 (23.6%) more than SHERRY and 886 (11.6%) more than SmartSeq2  
 147 (**Fig. 1b**). In addition, the evenness of gene body coverage for SHERRY2 was  
 148 significantly higher than that of the original SHERRY protocol (0.72 vs 0.84) and  
 149 was comparable to that of SmartSeq2 (0.84) (**Fig. 1c**). Moreover, the  
 150 reproducibility of SHERRY2 was significantly higher than that of SHERRY and  
 151 SmartSeq2 (**Fig. 1d**) due to its simplified workflow and stable performance. The  
 152 exonic rate of SHERRY2 was also improved in comparison with that of

153 SHERRY, likely due to the higher RT efficiency of the newly developed method  
 154 (Fig. 1e).  
 155

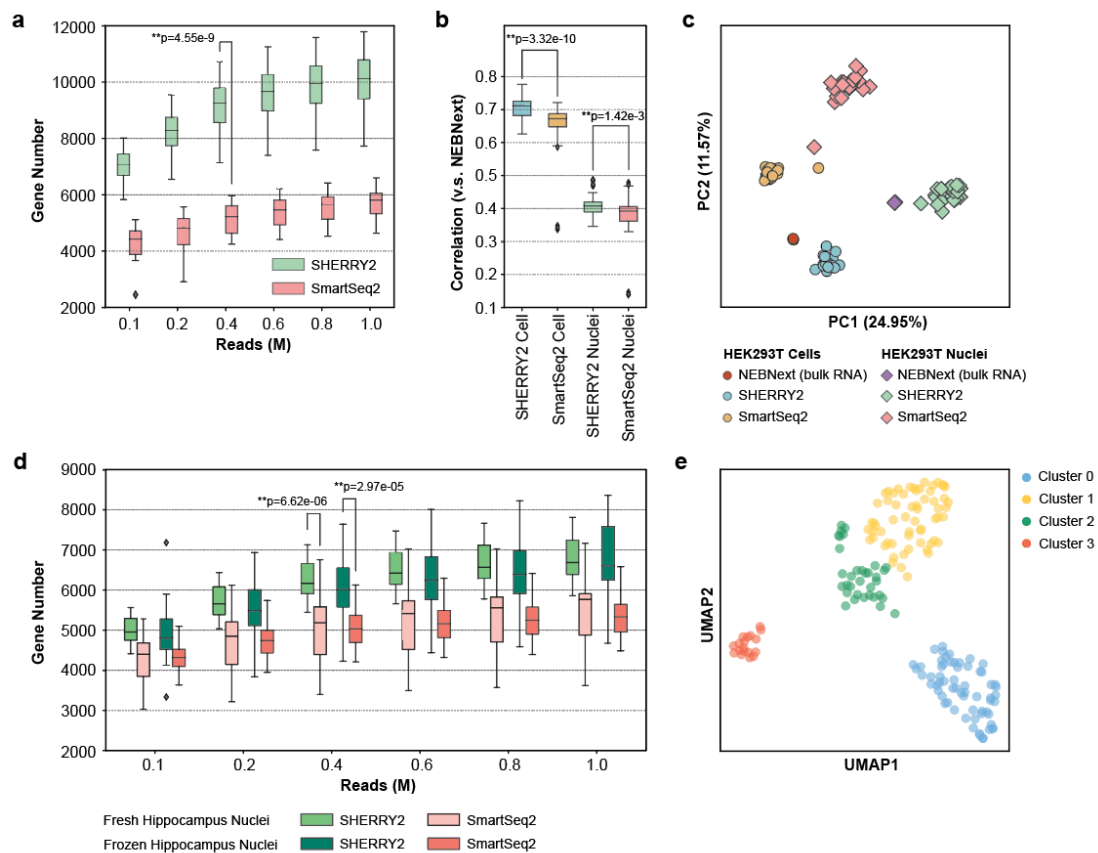

156

157 **Fig 2. Sensitivity and accuracy of SHERRY2.** a, Gene number (RPM>1) of single  
 158 HEK293T nuclei detected by SHERRY2 and SmartSeq2 when subsampling reads to  
 159 0.1, 0.2, 0.4, 0.6, 0.8 and 1 million reads. b, Gene expression correlation between  
 160 single HEK293T cells (or nuclei) and 200-ng RNA extracted from HEK293T cells (or  
 161 nuclei). Single-cell (or nucleus) data were acquired by SHERRY2 and SmartSeq2.  
 162 Bulk RNA results were acquired by the standard NEBNext protocol. The correlation  
 163 R-value was calculated by a linear fitting model with normalized gene counts. c,  
 164 Clustering of HEK293T cellular and nuclear RNA-seq data from SHERRY2,  
 165 SmartSeq2 and NEBNext using principal component analysis. The analysis utilized  
 166 differentially expressed genes (adjusted p-value < 1e-4 and fold change > 2)  
 167 between cells and nuclei detected by NEBNext. d, Gene number (RPM>1) of single  
 168 neuron nuclei detected by SHERRY2 and SmartSeq2 when subsampling reads to  
 169 0.1, 0.2, 0.4, 0.6, 0.8 and 1 million reads. The nuclei were isolated from mouse  
 170 hippocampi that were freshly prepared or previously frozen at -80°C. e, Clustering of  
 171 single hippocampal neuron nuclei visualized by UMAP plot. The snRNA-seq library  
 172 was prepared by SHERRY2. The analysis utilized genes expressed (counts > 0) in  
 173 more than 4 nuclei. The p-values in a, b, and d were calculated by the Mann-  
 174 Whitney-U test.

175

176

177 **SHERRY2 is highly accurate for scRNA-seq and snRNA-seq.**

178 Single nucleus RNA-seq (snRNA-seq) has gained popularity since fresh and  
 179 intact single cells are challenging to obtain in many applications. We tested the

180 performance of SHERRY2 on snRNA-seq using single nuclei isolated from  
181 HEK293T cells. SHERRY2 detected 10,137 genes (RPM>1) at 1-million reads,  
182 which was 4,330 (74.6%) more than SmartSeq2, demonstrating that SHERRY2  
183 had superior sensitivity for single nuclei (**Fig. 2a**). SHERRY2 also exhibited  
184 superior accuracy, as demonstrated by the significantly higher correlation  
185 between the SHERRY2 gene expression results and bias-free NEBNext  
186 libraries in comparison with that of SmartSeq2 (R=0.71 vs R=0.67 for scRNA-  
187 seq, and R=0.41 vs R=0.39 for snRNA-seq) (**Fig. 2b**).

188 In addition, scRNA-seq with SHERRY2 showed high tolerance to GC  
189 content and was insensitive to the length of transcripts (**Extended Data Fig. 4**).  
190 Unlike SmartSeq2, for which the gene overlap and expression correlation with  
191 bulk RNA-seq showed clear declines when GC-content was greater than 40%,  
192 SHERRY2 maintained these parameters at high and constant levels (82.6%  
193 overlap and R=0.76) until the GC content reached 60%. Transcript length did  
194 not influence the accuracy of SHERRY2 or SmartSeq2, although SmartSeq2  
195 exhibited a small degree of intolerance for transcripts longer than 800 bases.

196 The high accuracy and sensitivity of SHERRY2 allowed better distinction  
197 between HEK293T cells and their nuclei, which had minimal differences. We  
198 performed principal component analysis (PCA) using RNA-seq data from  
199 NEBNext, SHERRY2 and SmartSeq2 (**Fig. 2c**). Single cells and nuclei  
200 prepared by SHERRY2 were much closer in distance to the bulk RNA results  
201 in comparison with those prepared with SmartSeq2. In addition, the expression  
202 pattern of the differential genes identified by SHERRY2 was more similar to that  
203 of NEBNext in comparison with SmartSeq2 (**Extended Data Fig. 5**).

204  
205

#### 206 **snRNA-seq of mouse hippocampal neurons.**

207 snRNA-seq is a popular method for studies of brain tissue due to the technical  
208 challenge of isolating intact single neurons. We constructed snRNA-seq  
209 libraries of hippocampal neurons with SHERRY2 and SmartSeq2. For both  
210 frozen and freshly prepared hippocampus, SHERRY2 detected significantly  
211 more genes than SmartSeq2 (6,600 vs 5,331 at 1-million reads for frozen  
212 samples, 6,686 vs 5,769 at 1-million reads for fresh samples) (**Fig. 2d**).

213 Next, we sequenced a small number of fresh hippocampal neurons (176  
214 nuclei) with SHERRY2 and classified their cell types correctly. The nuclei were  
215 non-supervisedly clustered into 4 distinct groups (**Fig. 2e**), after which they  
216 were re-clustered using marker genes identified by sNuc-Seq<sup>16</sup> (**Extended**  
217 **Data Fig. 6**). The two clustering results were highly consistent. By comparing  
218 the expression pattern of sNuc-Seq marker genes with SHERRY2 expression  
219 data, three clusters in **Fig. 2e** were perfectly annotated: DG granule cells, CA1  
220 pyramidal cells and GABAergic interneuron cells (**Extended Data Fig. 6**).

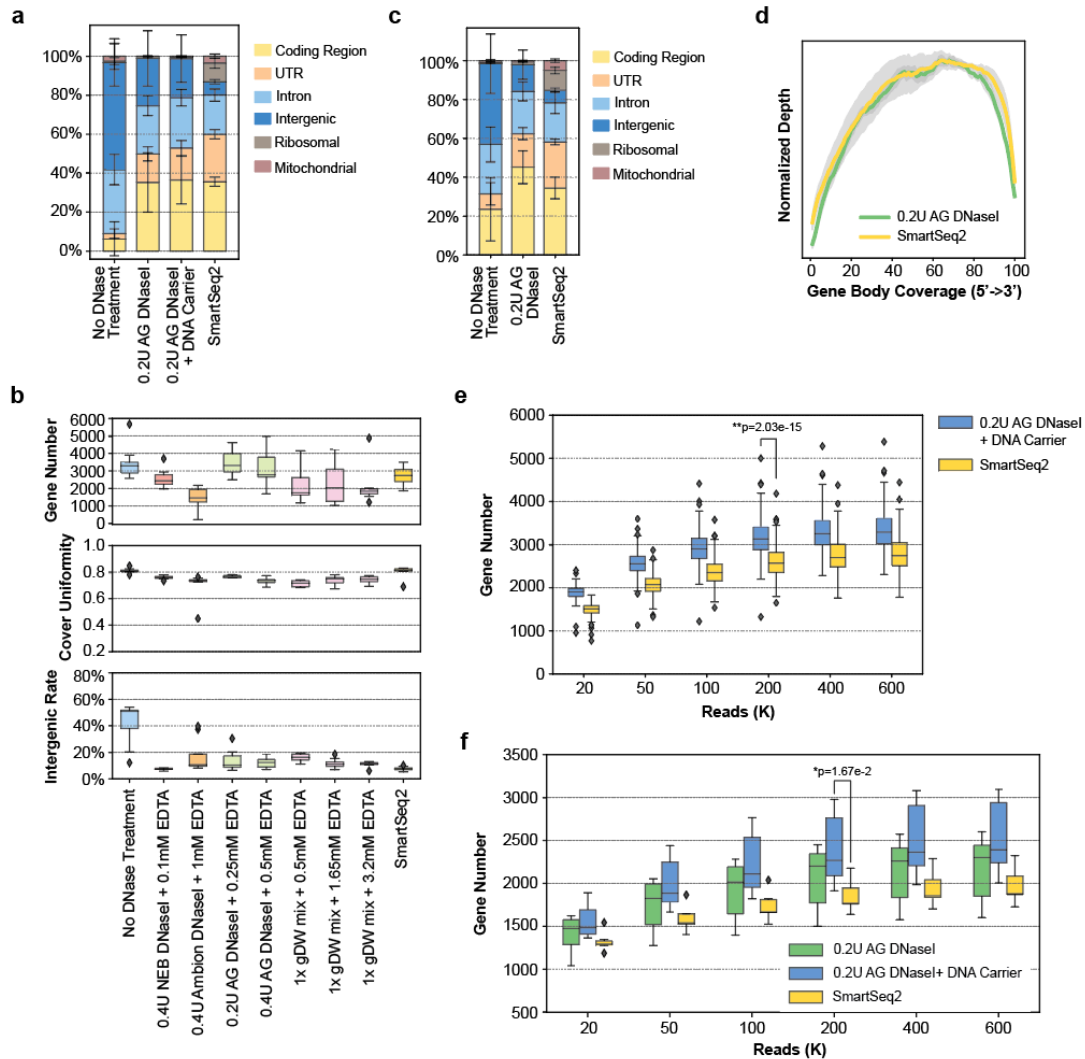

221  
222  
223  
224  
225  
226  
227  
228  
229  
230  
231  
232  
233  
234  
235  
236  
237  
238  
239  
240  
241  
242  
243  
244

**Fig 3. scRNA-seq of low RNA-content samples with SHERRY2.** **a**, Proportions of genome regions covered by reads from SHERRY2 without DNase treatment, SHERRY2 with AG DNase I addition, SHERRY2 with AG DNase I and DNA carrier addition, and SmartSeq2. **b**, Library quality of SHERRY2, including gene number (FPKM>1) at 0.25-million reads, coverage uniformity across gene body and percentage of reads that were mapped to intergenic regions with different DNases. The labels below the figure indicate the amounts and names of the DNases, as well as the EDTA concentration that was added during DNase inactivation. SmartSeq2 was also performed as a reference. **c**, Components of reads covering different genome regions detected by SHERRY2 without DNase treatment, SHERRY2 with optimized AG DNase I, and SmartSeq2. **d**, Gene body coverage detected by SHERRY2 (with AG DNase I) and SmartSeq2. The gray region shows the standard deviation of the normalized depth among replicates. **e**, Gene number (FPKM>1) detected by SHERRY2 (with AG DNase I and DNA carrier) and SmartSeq2 when subsampling to 20, 50, 100, 200, 400, and 600 thousand reads. The samples in **b-e** were single B cells isolated from murine GC light zones. **f**, Gene number (FPKM>1) detected by SHERRY2 with AG DNase I addition, SHERRY2 with AG DNase I and DNA carrier addition, and SmartSeq2 when subsampling to 20, 50, 100, 200, 400, and 600 thousand reads. Samples with intergenic rate lower than 25% were counted. The samples in **a** and **f** were single lymphocyte cells from murine eyeball blood. The p-values in **e** and **f** were calculated by the Mann-Whitney-U test. The error bars in **a** and **c** show the standard deviation.

245 Cluster 2 was found to consist of cells in an intermediate state between  
246 CA1 and GABAergic cells. Such groups of cells were previously found in 10X  
247 scRNA-seq data but not able to be well charcterized (**Extended Data Fig. 6**).  
248 The SHERRY2 results demonstrated that these clusters were reliable, while  
249 also revealing that they consisted of cells with relatively high expression of  
250 Tshz2 and Ptprd (**Extended Data Fig. 6**).

251  
252

### 253 **scRNA-seq using low RNA-content cells.**

254 For low RNA-content cells, such as immune cells<sup>17</sup>, we found that removal of  
255 intergenic DNA contaminations by DNase treatment was especially crucial for  
256 SHERRY2 scRNA-seq. In such cells, the open DNA regions of disassembled  
257 chromatin might be favored over RNA/DNA hybrids during Tn5 tagmentation.  
258 When DNase was omitted from the SHERRY2 protocol, more than 50% of  
259 reads sequenced from single mouse lymphocytes (**Extended Data Fig. 8**) were  
260 mapped to intergenic regions, and only around 10% of reads were exonic reads  
261 (**Fig. 3a**).

262 Different DNases performed differently in SHERRY2 scRNA-seq. We  
263 tested five DNases: NEB, Ambion, TURBO, AG, and gDW mix (short name).  
264 Three DNases (NEB, Ambion, and TURBO DNase I) that worked and  
265 inactivated at higher temperatures increased the intergenic rate unexpectedly,  
266 and this effect was probably due to RNA degradation at high temperatures with  
267 excess Mg<sup>2+</sup> in the reaction buffer. In contrast, AG DNase I and gDW mix, which  
268 worked at room temperature, yielded ideal results.

269 We confirmed that all the five DNases could digest more than 99.5% of  
270 DNA (30-ng) by simply utilizing divalent ions of their respective storage buffer.  
271 Without adding extra divalent ions, the intergenic rates of single germinal center  
272 (GC) B cells for all DNases were less than 20% (**Fig. 3b**). Among the DNases,  
273 AG DNase I retained high sensitivity for gene detection, and more than 60% of  
274 reads were mapped to exon regions (**Fig. 3c**), while the evenness of coverage  
275 was not affected (**Fig. 3d**).

276 Next, dU-containing carrier DNA, which prevented being amplified by  
277 dUTP-intolerant polymerase, was added to further improve the efficiency of  
278 tagmentation of RNA/DNA hybrids. With carrier DNA, SHERRY2 detected more  
279 than 3,200 genes at saturation (0.6-million reads) for single GC B cells (**Fig.**  
280 **3e**), and the number of detectable genes increased from 2,301 to 2,393 for  
281 single lymphocytes, with an exonic ratio comparable to that of SmartSeq2 (**Fig.**  
282 **3a, f**). Based on these results, chromatin digestion and the addition of carrier  
283 DNA were included in the standard SHERRY2 protocol.

284

### 285 **Selection dynamics in germinal centers profiled by SHERRY2.**

286 SHERRY2 can be scaled easily to thousands of single cells per batch, owing



287 to its simplified procedures. The GC is a transient structure that supports  
 288 antibody affinity maturation in response to T cell-dependent antigens, and it  
 289 contains diverse cell types with complex dynamics. Histologically, the GC can  
 290 be separated into two micro-compartments, the dark zone and the light  
 291 zone<sup>18,19</sup>. By surface phenotyping, cells in the two compartments can be  
 292 distinguished based on CXCR4, CD83 and CD86 markers<sup>20-22</sup>, with light-zone  
 293 cells being CXCR4<sup>lo</sup>CD83<sup>+</sup>CD86<sup>+</sup> while dark-zone cells are  
 294 CXCR4<sup>+</sup>CD83<sup>lo</sup>CD86<sup>lo</sup>. GC cells cycle between the dark zone state and the  
 295 light zone state. Dark zone cells are highly proliferative and undergo somatic  
 296 hypermutation, which generates a range of affinities against antigens. In the  
 297 light zone, these B cells compete with each other for survival factors and help  
 298 signals, which are mainly derived from follicular helper T cells. Those B cells  
 299 that have acquired higher-affinity B cell receptors are selected to differentiate  
 300 into plasma cells (PC) or memory B cells (MBC) or cycle back to the dark  
 301 zone<sup>19,23-25</sup>. Recently, gray zone, consisting of CXCR4<sup>+</sup>CD83<sup>+</sup> cells with distinct  
 302 gene expression patterns, was discovered and found to be involved in GC  
 303 recycling<sup>26</sup>. The complex spatiotemporal dynamics of the GC and their  
 304 underlying mechanisms are incompletely understood. To this end, sensitive  
 305 scRNA-seq methods that can be used to detect gene expression with less bias  
 306 are highly desirable.

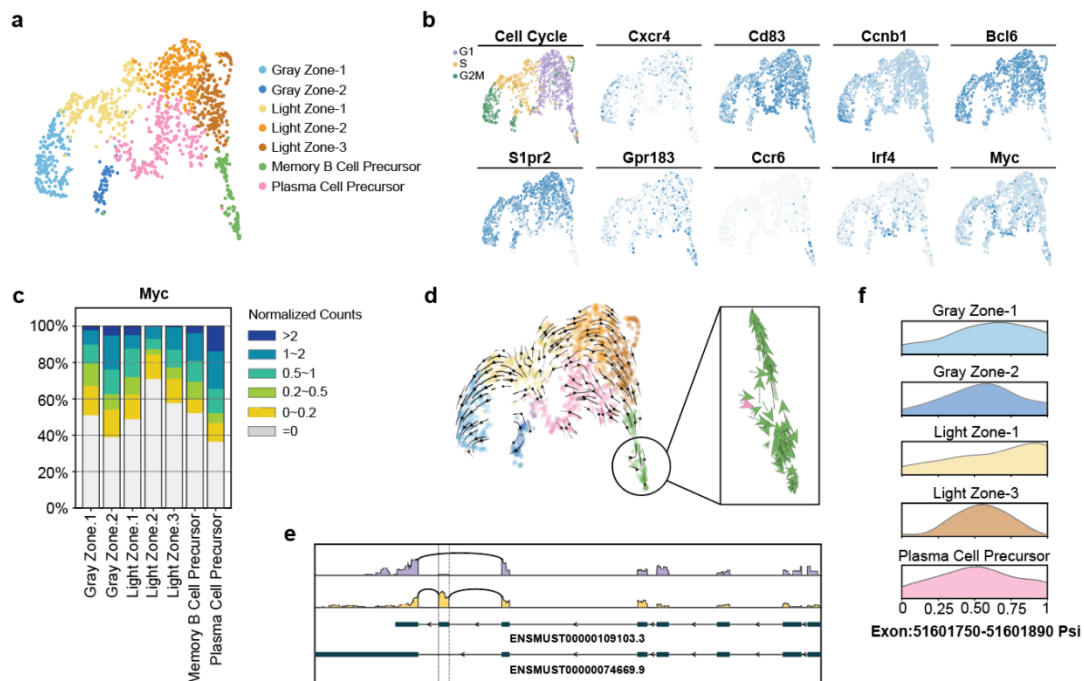

307  
 308 **Fig 4. Mouse germinal center profiled by scRNA-seq through SHERRY2. a,**  
 309 **Clustering of single B cells from murine GC light zones visualized by UMAP plot. The**  
 310 **library was prepared by SHERRY2 (with AG DNase I and DNA carrier). Different**  
 311 **colors indicate distinct cell types. b, Cell cycle and marker gene expression of**  
 312 **different cell types marked on a UMAP plot. The gradient colors correspond to the**  
 313 **normalized counts of a specific gene ranging from 0 (white) to 1 (blue). c, Distribution**

314 of *Myc* gene expression in different cell types. Different colors indicate different  
315 intervals of normalized *Myc* counts. The percentages of cells within the clusters  
316 falling into corresponding intervals were counted. **d**, Dynamic process of the GC light  
317 zone indicated by vector fields of RNA velocity on a UMAP plot. The expanded region  
318 shows the velocity vector of each cell. The colors correspond to the same cell types  
319 as annotated in **a**. **e**, Isoforms of the *Hnrnpab* gene. The top two lines show isoforms  
320 from two example cells that rarely and preferentially used the highlighted exon in  
321 *Hnrnpab* transcripts. The bottom two lines show the isoform structures of *Hnrnpab*  
322 transcripts that include or exclude the exon. **f**, Inclusion ratio distribution of the  
323 highlighted exon in **e** in different cell types. Only cell types represented by more than  
324 10 cells after filtering are shown.

325

326 We profiled 1,248 sorted CXCR4<sup>lo</sup>CD86<sup>hi</sup> GC light zone cells with  
327 SHERRY2, and 1,231 (98.6%) high-quality cells were retained for downstream  
328 analysis. The gene expression levels of *Cd19*, *Ccnd3*, *Fas*, *Cd86* and *Cxcr4*  
329 were consistent with flow cytometry gating, and no batch effect was observed  
330 (**Extended Data Fig. 8, 9**).

331 Unsupervised clustering identified seven clusters (**Fig. 4a**), two of which  
332 belonged to the gray zone, which was defined by co-expression of *Cxcr4* and  
333 *Cd83*, as well as on-going cell division (enriched *Ccnb1*)<sup>26</sup> (**Fig. 4b**). We  
334 observed the expected down-regulation of *Bcl6* and *S1pr2*, which are signature  
335 genes for GC B cells<sup>27,28</sup>, in memory B cell precursors (MPs) and plasma cell  
336 precursors (PPs). Specifically, *Ccr6* was exclusively enriched in MPs<sup>29</sup>, while  
337 *Irf4*, *Cd40*, *Icam1*, and *Slamf1* were up-regulated in PPs<sup>30</sup> (**Extended Data Fig.**  
338 **9**). The relatively low expression levels of *Prdm1* (not shown) and *Gpr183* in  
339 PPs were consistent with the early stage of plasma cell development. In total,  
340 1,071 genes significantly up- or down-regulated in specific clusters were  
341 identified (**Extended Data Fig. 9**).

342 The high sensitivity of SHERRY2 enabled detection of *Myc* in 588 (47.8%)  
343 single GC light zone B cells. Using fluorescent protein reporting, *Myc* was found  
344 to mark light-zone cells destined for dark zone re-entry<sup>31</sup>, although *Myc*  
345 expression *per se* has been difficult to identify in specific cell types by low-  
346 sensitivity scRNA-seq approaches<sup>32</sup>. Consistent with previous findings<sup>26,30</sup>,  
347 *Myc* expression was significantly higher in PPs (**Fig. 4b, Extended Data Fig.**  
348 **9**) and active in gray zones (**Fig. 4c**). Light Zone-1 also had a relatively higher  
349 portion of *Myc*<sup>+</sup> cells, which are probably those destined for cyclic reentry to the  
350 dark zone<sup>31</sup>. MPs also contained some cells that expressed *Myc*.

351 RNA velocity analysis (**Fig. 4d**) suggested that Light Zone-1 contained cells  
352 selected for dark zone reentry, which were migrating to the gray zone and had  
353 *Myc* expression characterized by burst kinetics (**Extended Data Fig. 9**). In  
354 addition, cells that appeared to have just entered the light zone were also  
355 identified. A few velocity vectors that moved to MPs were mixed in PPs, and  
356 these vectors were in the same direction with the down-regulation of *Myc*.  
357 According to the velocity analysis, the aforementioned *Myc*-expressing MPs  
358 seemed to have a tendency to cycle back to the GC, suggesting that some MPs

359 with Myc up-regulation have the potential to re-participate in GC reactions.

360 We then assembled the BCR sequence for each cell to screen the usage  
361 of Igh variable sequences, which were assigned in 1,101 (89.4%) cells. As  
362 expected<sup>33</sup>, IGHV1-72 dominated the NP-reactive GC response, and the  
363 coupled light chain was mainly IgL rather than IgK (**Extended Data Fig. 10**). In  
364 addition, we identified CDR1 and CDR2 regions in 269 (24.4%) and 493 (44.8%)  
365 cells in which Igh variable sequences were assigned, respectively.

366 SHERRY2 revealed differences in the usage frequencies of exons across  
367 cell types. The usage of a particular exon (chr11: 51,601,750-51,601,890)  
368 within the *Hnrnpab* transcript (**Fig. 4e**), which is widely expressed and encodes  
369 a protein that mainly functions in processing pre-mRNAs, was significantly  
370 biased among GC clusters. As shown in **Fig. 4f**, Light Zone-1 cells favored  
371 inclusion of this exon.

372

373

## 374 **Summary**

375 We present SHERRY2, an RNA-seq method designed for single cells and  
376 single nuclei. SHERRY2 is based on the direct tagmentation function of Tn5  
377 transposase for RNA/DNA hetero-duplexes, and it provides high sensitivity,  
378 high accuracy, and high throughput for applications that require a large number  
379 of genes to be identified in each cell. The SHERRY2 method is relatively easy  
380 to perform, and it could be incorporated into other sequencing modalities for  
381 single cells.

382

383

## 384 **Methods**

### 385 **Cell culture**

386 HEK293T cell line was purchased from ATCC and incubated at 37°C with 5%  
387 CO<sub>2</sub> in Dulbecco's Modified Eagle Medium (DMEM) (Gibco, 11965092), which  
388 was supplemented with 10% fetal bovine serum (FBS) (Gibco, 1600044) and  
389 1% penicillin-streptomycin (Gibco, 15140122). Cells were dissociated by 0.05%  
390 Trypsin-EDTA (Gibco, 25300062) at 37°C for 4min and washed by DPBS  
391 (Gibco, 14190136).

392 For DNA or RNA extractions, we took ~10<sup>6</sup> suspended cells, and followed  
393 the guideline of PureLink Genomic DNA Mini Kit (Invitrogen, K182002) or  
394 RNeasy Mini Kit (Qiagen, 74104). The extracted RNA was further dealt with  
395 20U DNase I (NEB, M0303) for removal of DNA and re-purified by RNA Clean  
396 & Concentrator-5 kit (Zymo Research, R1015).

397 For single nuclei preparation, we followed the guideline of Nuclei EZ Prep  
398 kit (Sigma, NUC-101) and resuspended the nuclei into DPBS. Both single cells

399 and single nuclei were sorted by FACS Aria SORP flow cytometer (BD  
400 Biosciences).

401

#### 402 **Mice**

403 For samples of hippocampus nuclei and lymphocytes, aged (2-months old)  
404 male C57BL/6 mice were used and obtained from Charles River Laboratories.

405 For samples of germinal center B cells, C57BL/6 mice were originally from  
406 the Jackson Laboratory. 6-12 week-old, age- and sex-matched mice were used  
407 for the experiments.

408 All mice were maintained under specific pathogen-free conditions and used  
409 in accordance of governmental, Capital Medical University, and Tsinghua  
410 University guidelines for animal welfare.

411

#### 412 **Hippocampal nuclei preparation and sorting**

413 The isolated hippocampus tissue was transferred into a Dounce homogenizer  
414 (Sigma, D8938) containing 2ml of EZ Lysis Buffer (Sigma, NUC-101). The  
415 tissue was carefully dounced for 22 times with pestle A followed by 22 times  
416 with pestle B, then transferred to a 15ml-tube. Next, 1ml of EZ lysis buffer was  
417 added into the Dounce homogenizer to resuspend residual nuclei, then  
418 transferred to the same 15ml tube. The samples were centrifuged at 300g for 5  
419 min. Supernatant was removed and the pellet was resuspended in 100 $\mu$ l of ice-  
420 cold PBS (Gibco, 10010023) with 1% BSA (NEB, B9000S) and 20U RRI  
421 (Takara, 2313). 40 $\mu$ m FlowMi cell strainers were firstly wetted with PBS and  
422 filtered the resuspended nuclei into 1.5 ml Eppendorf tubes. The nuclei were  
423 further washed by PBS (1% BSA).

424 To enrich neuron nuclei, 1,000-fold diluted mouse Anti-NeuN antibody  
425 (Millipore, MAB377) was added into 0.5ml nuclei suspension and incubated  
426 with the nuclei at 4°C for 30min. The nuclei were then stained with 1000-fold  
427 diluted Goat anti-Mouse IgG (H&L) antibody (Abcam, ab150113) and washed  
428 with PBS (1% BSA). The whole process was on ice. As gated in **Extended**  
429 **Data Fig. 6**, single neuron nuclei were sorted with FACS Aria SORP flow  
430 cytometer.

431 For frozen samples, hippocampus tissues were previously flash frozen in  
432 liquid nitrogen, and stored in -80°C. Before single nuclei preparation, they were  
433 thawed on ice totally.

434

#### 435 **GC light zone B cells preparation and sorting**

436 To generate T-cell dependent GC responses in B6 mice, 100 $\mu$ g NP-KLH  
437 (Biosearch Technologies, N-5060-5) plus 1 $\mu$ g LPS (Sigma, L6143) emulsified  
438 in 100 $\mu$ l 50% alum (Thermo, 77161) were utilized for intraperitoneal  
439 immunization.

440 Spleens isolated from 4 mice of 13-days post immunization were placed on

441 a 70µm cell strainer (Falcon, 08-771-2), which was previously wetted with  
442 MACS buffer (1% FBS and 5mM EDTA in PBS), and minced by flat end of the  
443 plunger of 2ml syringes (Becton Dickinson, 301940). The splenocytes passed  
444 through the strainer with MACS buffer into a 50ml-tube. The mixed red blood  
445 cells were then lysed by ACK lysis buffer (Thermo, A1049201). The cell  
446 suspension was further incubated with biotinylated 4-Hydroxy-3-iodo-5-  
447 nitrophenylacetyl (NIP)15-BSA (Biosearch Technologies, N-1027-5) for 1.5h,  
448 and enriched by Anti-biotin cell isolation kit (Miltenyi Biotec, 130-090-485) to  
449 get NP-reactive cells.

450 The enriched cells were blocked with 20µg/ml 2.4G2 antibody (BioXCell,  
451 BE0307) and subsequently stained with APC-Cy7 (anti-B220, BD Biosciences,  
452 552094), PE-Cy7 (anti-CD95, BD Biosciences, 557653), eF450 (anti-GL7,  
453 eBioscience, 48-5902-82), APC (anti-CD86, eBioscience, 17-0862-82) and PE  
454 (anti-CXCR4, BioLegend, 146505). Also, 7-AAD (Biotium, 40037) was stained  
455 to exclude dead cells. All staining reactions were incubated in MACS staining  
456 buffer (1% FBS and 5mM EDTA in PBS) for 30min on ice, followed by 3 times  
457 of washings. As gated in **Extended Data Fig. 8**, single GC Light Zone B cells  
458 (B220<sup>+</sup> GL7<sup>+</sup> Fas<sup>+</sup> CD86<sup>+</sup> CXCR4<sup>-</sup>) were sorted into in lysis buffer using Aria III  
459 flow cytometer (BD Biosciences).

460

#### 461 **Lymphocyte cells preparation and sorting**

462 The retro-orbital blood was taken from the eyeball of ether-anesthetized mice  
463 and dipped into K2EDTA tube (BD Vacutainer, 367525). PBS was added to  
464 dilute blood at ~50%. 1ml diluted blood was transferred into a clean 15ml-tube  
465 and incubated with 9ml 1x red blood cells lysing solution (BD Pharm Lyse,  
466 555899) at room temperature for 15min avoiding light. The resulted cell  
467 suspension was washed twice by PBS containing 1% BSA at 200g for 5min,  
468 followed by staining with SYTOX green (Thermo, S7020) to identify intact cells.  
469 Single lymphocytes were sorted with FACS Aria SORP flow cytometer  
470 according to the gates shown in **Extended Data Fig. 8**.

471

#### 472 **DNA carrier preparation**

473 100-ng pTXB1 plasmids were firstly linearized by 10U XbaI (NEB, R0145S) at  
474 37°C for 1h and purified by Zymo columns. Then we took 0.5-ng linearized  
475 plasmids for multiple displacement amplification (MDA), with all dTTPs  
476 replaced by dUTPs. Specifically, the 1µl DNA was mixed with 22µl reaction  
477 buffer containing 1x phi29 reaction buffer (NEB, M0269S), 20µM random  
478 primers (Thermo, SO181) and 1mM dNTP (NEB, N0446S and N0459S), then  
479 they were incubated at 98°C for 3min and immediately cooled down at 4°C for  
480 20min. 2µl phi29 DNA polymerase was added and the amplification was carried  
481 out at 30°C for 5h, terminated at 65°C for 10min. The products were purified by  
482 Zymo columns.

483

#### 484 **Generation of RNA-seq library**

485 We constructed NEBNext libraries with 200- and 10-ng RNA by following the  
486 guideline of NEBNext Ultra II RNA Library Prep Kit for Illumina kit (NEB, E7770).  
487 SmartSeq2 libraries with single cells were prepared following the protocol that  
488 was reported by Picelli, S. *et al.* 10X libraries of 10,000 single hippocampal  
489 nuclei were constructed by Chromium Single Cell 3' Reagent Kits (v3.1).

490 For scRNA-seq library of SHERRY2, single cells were sorted into 96-well  
491 plates containing 2 $\mu$ l lysis buffer which consisted of 0.5% Triton X-100 (Sigma,  
492 T9284), 2U SUPERaseIn RNase Inhibitor (Thermo, AM2694), 0.2U AG DNase  
493 I (Thermo, 18068015). The plates were immediately spun down and incubated  
494 at 20°C for 10min for DNA digestion. The plates could be stored at -80°C or  
495 proceeded with next step. 2 $\mu$ l inactivation buffer containing 5 $\mu$ M OligodTs  
496 (T<sub>30</sub>VN, Sangon), 5mM dNTPs and 1mM EDTA (Thermo, AM9260G) was then  
497 added and the reaction was incubated at 65°C for 10min and 72°C for 3min to  
498 facilitate RNA denaturation at the same time. Next, RT was performed by  
499 adding 6 $\mu$ l RT mix (70U SuperScript IV (Thermo, 18090050), 1.7x SSIV buffer,  
500 8.3mM DTT, 10U RRI, 1.7M Betaine (Sigma, B0300)) and incubated at 50°C  
501 for 50min, then inactivated the reverse transcriptase at 80°C for 10min. The  
502 resulted RNA/DNA hybrids mixed with 10-pg DNA carriers were tagged by  
503 0.05 $\mu$ l TTE Mix V50 (Vazyme, TD501) at 55°C for 30 min, through adding 10 $\mu$ l  
504 reaction mix containing 2x TD buffer (20mM Tris-HCl (ROCKLAND, MB-003),  
505 10mM MgCl<sub>2</sub> (Thermo, AM9530G), 20% N,N-Dimethylformamide (Sigma,  
506 D4551)), 16% PEG8000 (VWR Life Science, 97061), 0.5mM ATP (NEB,  
507 P0756), 8U RRI. 6U Bst 3.0 DNA polymerase (NEB, M0374M) within 1 x Q5  
508 high-fidelity master mix were utilized to repair the gap left by V50 at 72°C for  
509 15min, followed by 80°C for 5min to terminate the reaction. Finally, 3 $\mu$ l indexed  
510 primers mix (Vazyme, TD203) and 3 $\mu$ l Q5 mix were added to perform PCR  
511 amplification. PCR cycled as following: 98°C 30s for initial denaturation, 21  
512 cycles of 20s at 98°C, 20s at 60°C and 2min at 72°C, 72°C 5min for final  
513 extension. The indexed products were merged and purified at 0.75x with  
514 VAHTS DNA Clean Beads (Vazyme, N411).

515 Libraries were quantified with Qubit 2.0 and their fragment length  
516 distributions were checked by Fragment Analyzer Automated CE System.  
517 Libraries were sequenced by Illumina NextSeq 500 or NovaSeq S4.

518

#### 519 **RNA-seq data analysis**

520 **Data quality.** Adaptors, poly(A/T) sequences were trimmed, bases with quality  
521 less than 20 and reads shorter than 20 bases were removed from the raw  
522 sequencing data by Cutadapt (v1.15). Clean reads were mapped to indexed  
523 genome (human: Gencode.v31, mouse: Gencode.vM23) by STAR (2.7.1a).  
524 Only unique alignment was utilized for downstream analysis. The mitochondrial

525 and ribosomal ratios were counted with samtools (v1.10). The ratios of coding  
526 region, UTR, intron and intergenic region were counted with Picard tools  
527 (v2.17.6). Exonic rate was defined as sum of coding region and UTR ratios. For  
528 cells, Cufflinks (v2.2.1) with exon annotations of protein coding genes were  
529 used to count gene number (FPKM>1). For nuclei, genes (RPM>1) were  
530 counted by featureCounts (v1.5.1) with transcript annotations. Coverage across  
531 gene body was calculated by RSeQC (v2.6.4). The coverage uniformity was  
532 integral area between coverage curve and x-axis normalized by 100.

533 **Clustering and marker genes.** For scRNA-seq and snRNA-seq, clustering  
534 followed the basic tutorials of Scanpy (v1.8.1). The cell type annotations were  
535 through manually checking expression of well-known marker genes. Marker  
536 genes that identified by SHERRY2 should satisfy following conditions: 1)  
537 adjusted p-values calculated by Mann-Whitney-U test were less than 1e-3; 2)  
538 foldchanges were greater than 1.5 or less than 0.67; 3) The average normalized  
539 counts of up-regulated gene in the cell type, or down-regulated gene in the rest  
540 of cell types was greater than 0.3. For NEBNext, DESeq2 (v1.22.2) was utilized  
541 to identify the differentially expressed genes (adjusted p-value < 1e-4,  
542 foldchange > 2).

543 **RNA Velocity.** Splicing and unsplicing mRNA were quantified by Velocity  
544 (v0.17.17) with unique alignment. The generated loom file was utilized by  
545 scVelo (v0.2.4) to profile velocity dynamics based on clustering results of  
546 Scanpy.

547 **BCR assembly.** BCR sequences of each cell was assembled by MIXCR  
548 (v3.0.13) with clean reads. The assembled BCR were realigned by IgBlast  
549 (v1.17.1) to determine clone types.

550 **Exon usage.** The frequency of exon usage in each cell was calculated by BRIE  
551 (v2.0.5). For each exon, cells satisfying following conditions were retained: 1)  
552 counts of gene which included the exon were greater than 10; 2) exon regions  
553 sided by the specific exon should be covered by greater than 50% with uniquely  
554 aligned reads; 3) at least one read should detect junctions involved in this exon  
555 splicing events. Pairwise comparison of exon usage frequency was made  
556 between cell types which contained greater than 10 cells using Mann-Whitney-  
557 U test. The exons with p-value less than 0.05 was further checked in IGV viewer  
558 to check whether transcript coverage was consistent with usage frequency. The  
559 passed ones were considered as significantly biased among cell types.

560  
561

## 562 **Acknowledgement**

563 We thank Chenyang Geng and Yan Chen from the Peking University High-  
564 throughput Sequencing Center and Biomedical Pioneering Innovation Center  
565 for experimental assistance. This work was supported by the National Key

566 Research and Development Program of China (2018YFA0108100 to Y.H.),  
567 National Natural Science Foundation of China (22050002, 21927802 to Y.H.),  
568 Beijing Municipal Science and Technology Commission (Z201100005320016  
569 to Y.H.), Beijing Advanced Innovation Center for Genomics, and Shenzhen Bay  
570 Laboratory.

571

572

## 573 **Author contributions**

574 Y.H. and J.W. conceived the study; L.D., B.L., Y.L., S.Z., Y.P., and J.S.  
575 performed experiments; L.D. performed data analyses; C.Z. and J.S. provided  
576 samples; L.D., B.L., J.W., H.Q., J.S., and Y.H. wrote manuscript with input from  
577 all authors; Y.H., J.W., and H.Q. supervised all aspects of this study.

578

579

## 580 **References**

- 581 1 Mortazavi, A., Williams, B. A., McCue, K., Schaeffer, L. & Wold, B.  
582 Mapping and quantifying mammalian transcriptomes by RNA-Seq.  
583 *Nature methods* **5**, 621-628 (2008).
- 584 2 Cui, P. *et al.* A comparison between ribo-minus RNA-sequencing and  
585 polyA-selected RNA-sequencing. *Genomics* **96**, 259-265 (2010).
- 586 3 Picelli, S. *et al.* Smart-seq2 for sensitive full-length transcriptome  
587 profiling in single cells. *Nature methods* **10**, 1096-1098 (2013).
- 588 4 Bagnoli, J. W. *et al.* Sensitive and powerful single-cell RNA sequencing  
589 using mcSCRIB-seq. *Nature communications* **9**, 1-8 (2018).
- 590 5 Zheng, G. X. *et al.* Massively parallel digital transcriptional profiling of  
591 single cells. *Nature communications* **8**, 1-12 (2017).
- 592 6 Perez, J. D. *et al.* Subcellular sequencing of single neurons reveals the  
593 dendritic transcriptome of GABAergic interneurons. *Elife* **10**, e63092  
594 (2021).
- 595 7 Oguchi, Y., Ozaki, Y., Abdelmoez, M. N. & Shintaku, H. NanoSINC-seq  
596 dissects the isoform diversity in subcellular compartments of single cells.  
597 *Science Advances* **7**, eabe0317 (2021).
- 598 8 Becht, E. *et al.* Dimensionality reduction for visualizing single-cell data  
599 using UMAP. *Nature biotechnology* **37**, 38-44 (2019).
- 600 9 Trapnell, C. & Cacchiarelli, D. Monocle: Differential expression and time-  
601 series analysis for single-cell RNA-Seq and qPCR experiments.  
602 *Bioconductor. Fmrp. Usp. Br* **2** (2014).
- 603 10 La Manno, G. *et al.* RNA velocity of single cells. *Nature* **560**, 494-498  
604 (2018).
- 605 11 Wang, X., He, Y., Zhang, Q., Ren, X. & Zhang, Z. Direct comparative



- 606 analyses of 10X Genomics Chromium and smart-seq2. *Genomics,*  
607 *Proteomics & Bioinformatics* (2021).
- 608 12 Di, L. *et al.* RNA sequencing by direct fragmentation of RNA/DNA hybrids.  
609 *Proceedings of the National Academy of Sciences* **117**, 2886-2893  
610 (2020).
- 611 13 Chen, C. *et al.* MINERVA: a facile strategy for SARS-CoV-2 whole-  
612 genome deep sequencing of clinical samples. *Molecular cell* **80**, 1123-  
613 1134. e1124 (2020).
- 614 14 Gerard, G. F., Collins, S. & Smith, M. D. Excess dNTPs minimize RNA  
615 hydrolysis during reverse transcription. *Biotechniques* **33**, 984-990  
616 (2002).
- 617 15 Chandler, D. P., Wagnon, C. A. & Bolton Jr, H. Reverse transcriptase  
618 (RT) inhibition of PCR at low concentrations of template and its  
619 implications for quantitative RT-PCR. *Applied and environmental*  
620 *microbiology* **64**, 669-677 (1998).
- 621 16 Habib, N. *et al.* Div-Seq: Single-nucleus RNA-Seq reveals dynamics of  
622 rare adult newborn neurons. *Science* **353**, 925-928 (2016).
- 623 17 Yamawaki, T. M. *et al.* Systematic comparison of high-throughput single-  
624 cell RNA-seq methods for immune cell profiling. *BMC genomics* **22**, 1-  
625 18 (2021).
- 626 18 MacLennan, I. C. Germinal centers. *Annual review of immunology* **12**,  
627 117-139 (1994).
- 628 19 Victora, G. D. & Nussenzweig, M. C. Germinal centers. *Annual review of*  
629 *immunology* **30**, 429-457 (2012).
- 630 20 Allen, C. D. *et al.* Germinal center dark and light zone organization is  
631 mediated by CXCR4 and CXCR5. *Nature immunology* **5**, 943-952 (2004).
- 632 21 Caron, G., Le Gallou, S., Lamy, T., Tarte, K. & Fest, T. CXCR4  
633 expression functionally discriminates centroblasts versus centrocytes  
634 within human germinal center B cells. *The Journal of Immunology* **182**,  
635 7595-7602 (2009).
- 636 22 Victora, G. D. *et al.* Germinal center dynamics revealed by multiphoton  
637 microscopy with a photoactivatable fluorescent reporter. *Cell* **143**, 592-  
638 605 (2010).
- 639 23 Victora, G. D. SnapShot: the germinal center reaction. *Cell* **159**, 700-700.  
640 e701 (2014).
- 641 24 Mesin, L., Ersching, J. & Victora, G. D. Germinal center B cell dynamics.  
642 *Immunity* **45**, 471-482 (2016).
- 643 25 De Silva, N. S. & Klein, U. Dynamics of B cells in germinal centres.  
644 *Nature reviews immunology* **15**, 137-148 (2015).
- 645 26 Kennedy, D. E. *et al.* Novel specialized cell state and spatial  
646 compartments within the germinal center. *Nature immunology* **21**, 660-  
647 670 (2020).

- 648 27 Green, J. A. *et al.* The sphingosine 1-phosphate receptor S1P 2  
649 maintains the homeostasis of germinal center B cells and promotes  
650 niche confinement. *Nature immunology* **12**, 672-680 (2011).
- 651 28 Huang, C. & Melnick, A. Mechanisms of action of BCL6 during germinal  
652 center B cell development. *Science China Life sciences* **58**, 1226-1232  
653 (2015).
- 654 29 Suan, D. *et al.* CCR6 defines memory B cell precursors in mouse and  
655 human germinal centers, revealing light-zone location and predominant  
656 low antigen affinity. *Immunity* **47**, 1142-1153. e1144 (2017).
- 657 30 Ise, W. *et al.* T follicular helper cell-germinal center B cell interaction  
658 strength regulates entry into plasma cell or recycling germinal center cell  
659 fate. *Immunity* **48**, 702-715. e704 (2018).
- 660 31 Dominguez-Sola, D. *et al.* The proto-oncogene MYC is required for  
661 selection in the germinal center and cyclic reentry. *Nature immunology*  
662 **13**, 1083-1091 (2012).
- 663 32 Laidlaw, B. J., Duan, L., Xu, Y., Vazquez, S. E. & Cyster, J. G. The  
664 transcription factor Hhex cooperates with the corepressor Tle3 to  
665 promote memory B cell development. *Nature immunology* **21**, 1082-  
666 1093 (2020).
- 667 33 Jacob, J. & Kelsoe, G. In situ studies of the primary immune response  
668 to (4-hydroxy-3-nitrophenyl) acetyl. II. A common clonal origin for  
669 periarteriolar lymphoid sheath-associated foci and germinal centers. *The*  
670 *Journal of experimental medicine* **176**, 679-687 (1992).
- 671

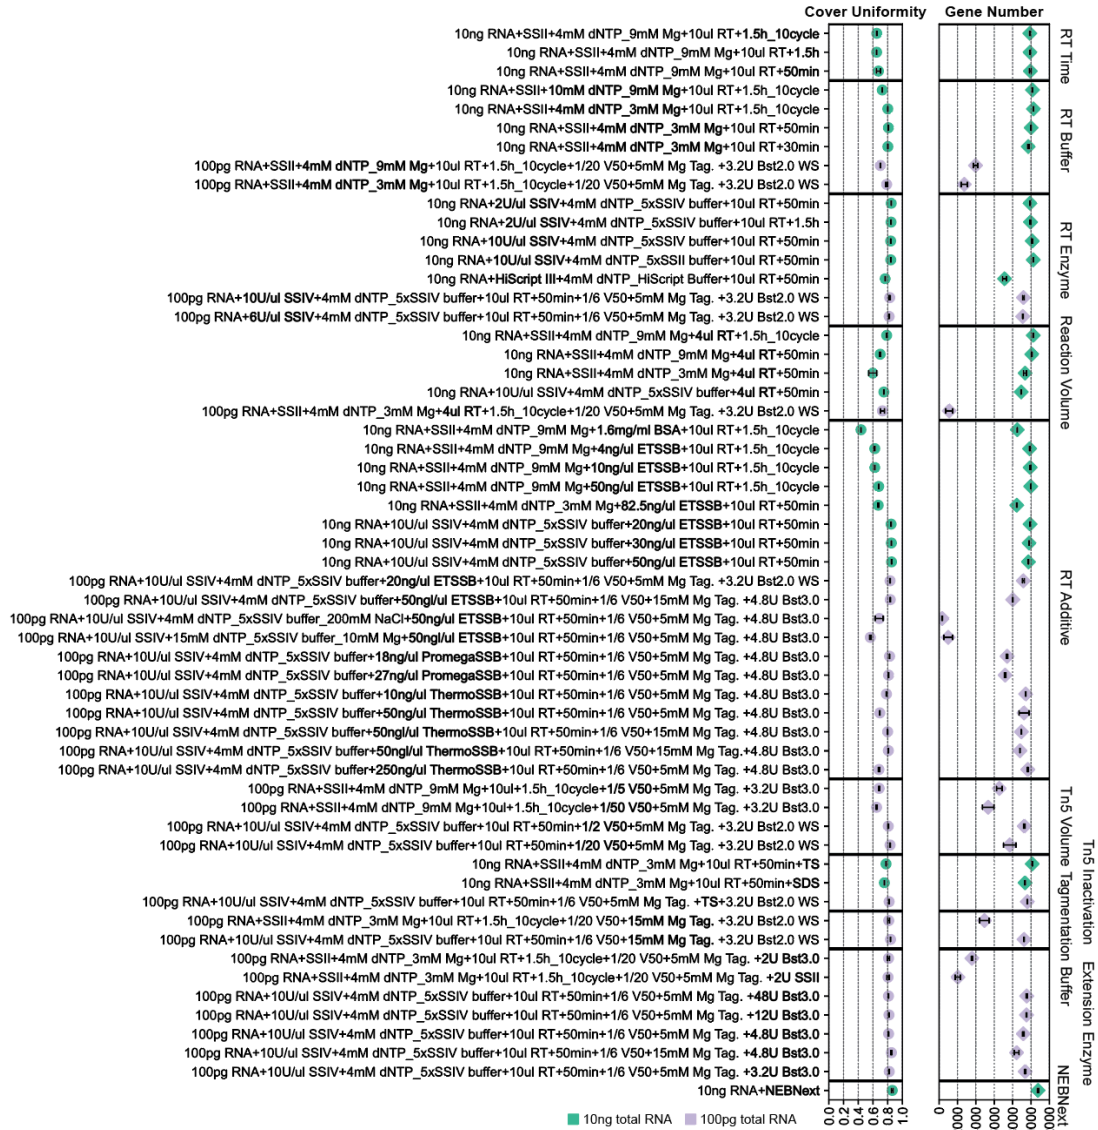

**Extended Data Fig. 1 Conditions for bulk RNA.** RNA-seq library quality of 10-ng (green) and 100-pg (purple) HEK293T RNA samples when testing different conditions of the SHERRY protocol. The coverage uniformity across gene body and gene number (FPKM>1) at 0.25-million reads are shown here. The bolded fonts of the labels indicate key variations compared to the basic protocol. The NEBNext standard protocol was performed with 10-ng HEK293T RNA as a reference. The error bars show the standard deviation.

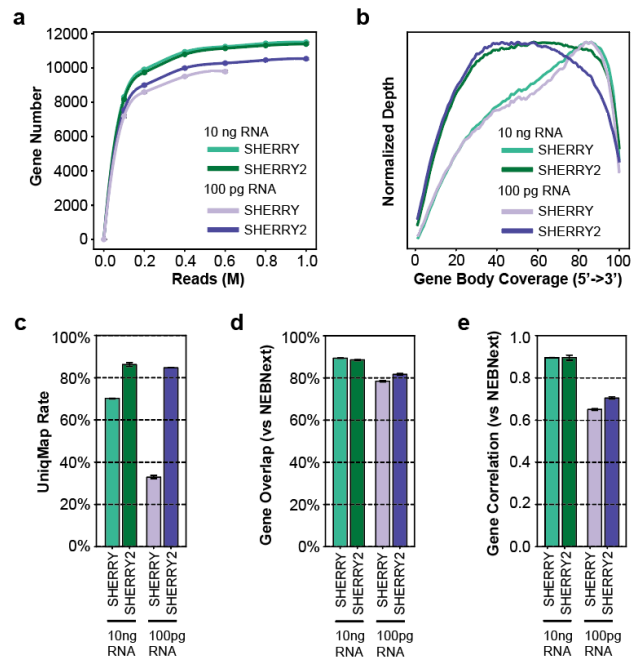

**Extended Data Fig. 2 Improved performance of SHERRY2 on bulk RNA. a,** Saturation curve of SHERRY and SHERRY2. The gene number (FPKM>1) is shown for sequencing at 0.2, 0.4, 0.6, 0.8, and 1.0 million reads. **b,** Gene body coverage detected by SHERRY and SHERRY2. **c,** Ratio of reads that uniquely mapped to the human genome. **d,** Ratio of expressed genes (FPKM>1) in the NEBNext results that overlapped the SHERRY and SHERRY2 results. **e,** Correlation of overlapped gene counts between NEBNext and the two protocols: SHERRY and SHERRY2. The inputs of SHERRY and SHERRY2 in **a-e** were 10-ng and 100-pg HEK293T RNA. The input of NEBNext in **d** and **e** was 200-ng HEK293T RNA. The error bars in **c-e** show the standard deviation.

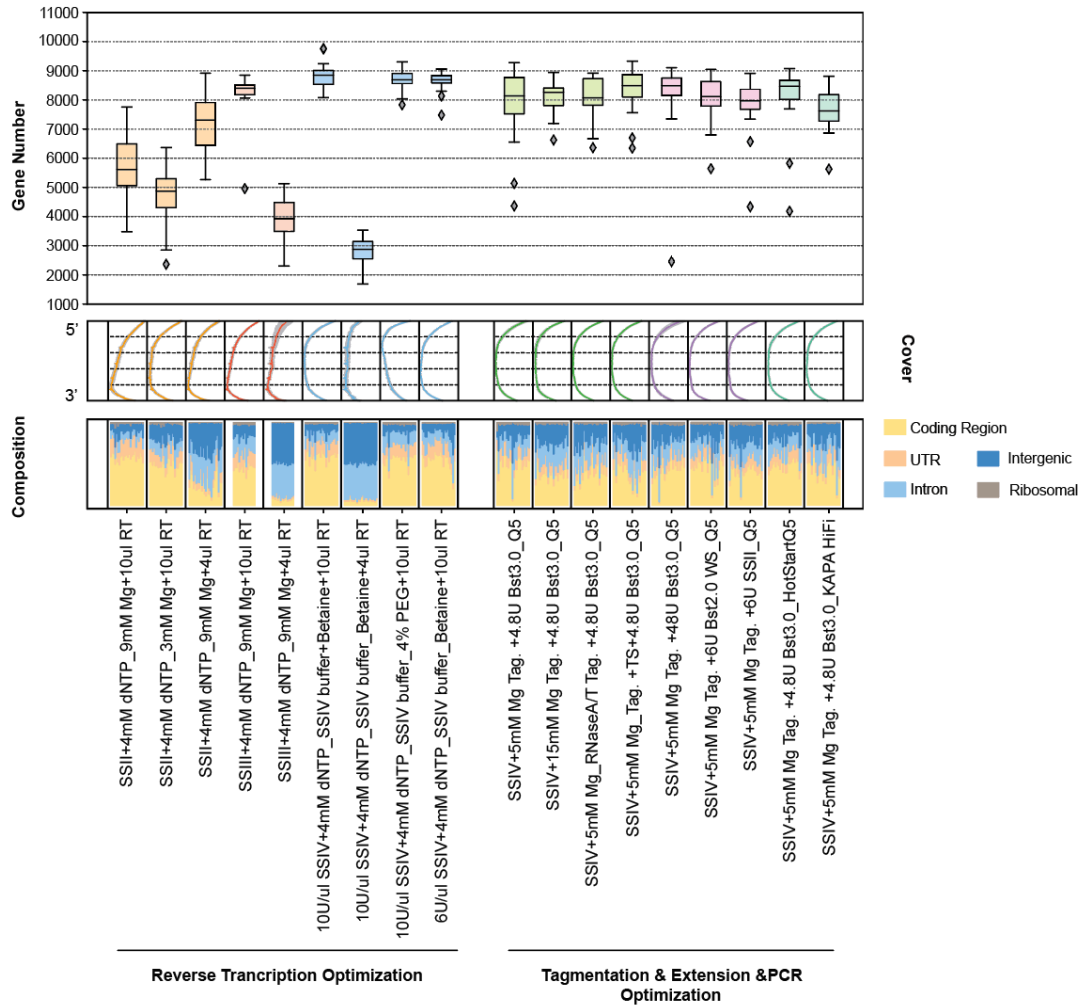

**Extended Data Fig. 3 Conditions for single cells.** scRNA-seq library quality of single HEK293T cells when testing different conditions of SHERRY protocol. The gene number (FPKM>1) at 0.25-million reads, gene body coverage and composition of reads mapped to different genome regions are shown. The colors of the boxplot and coverage plot indicate key variations in different steps. The gray region of the coverage plot shows the standard deviation of normalized depth among replicates.

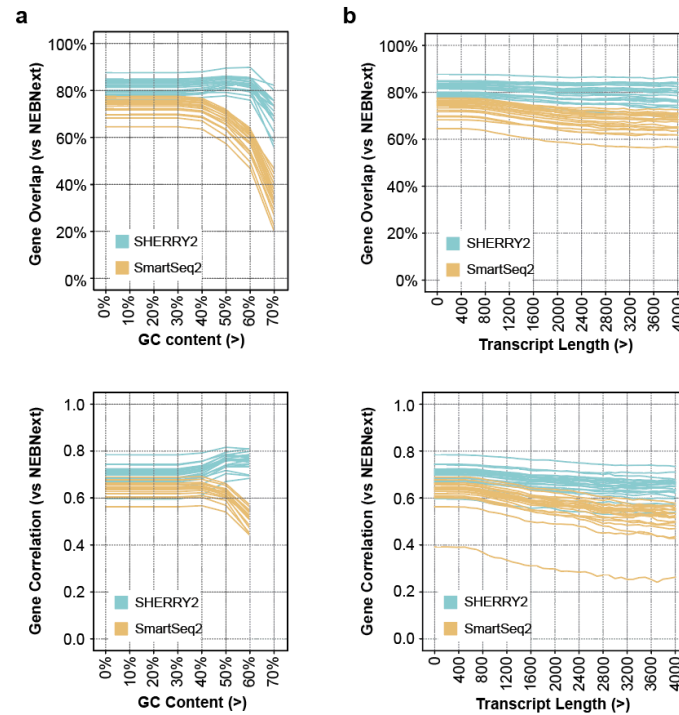

**Extended Data Fig. 4 Accuracy of SHERRY2 for single cells.** **a**, Ratio of expressed genes (FPKM>1) with different GC-content in the NEBNext results that overlapped by SHERRY2 and SmartSeq2, and the correlation of overlapped gene expression results between NEBNext and the two scRNA-seq methods. The x-axis indicates the minimum level of GC-content. Fewer than 100 genes had GC content >70%, and they were not included in the analysis. Each line represents one cell. **b**, Gene overlap ratios and correlation of gene counts between NEBNext and the two scRNA-seq methods, utilizing genes with different transcript lengths from the NEBNext results. The inputs of SHERRY2 and SmartSeq2 were single HEK293T cells. The input of NEBNext was 200-ng HEK293T RNA. The correlation R-value was calculated by a linear fitting model.

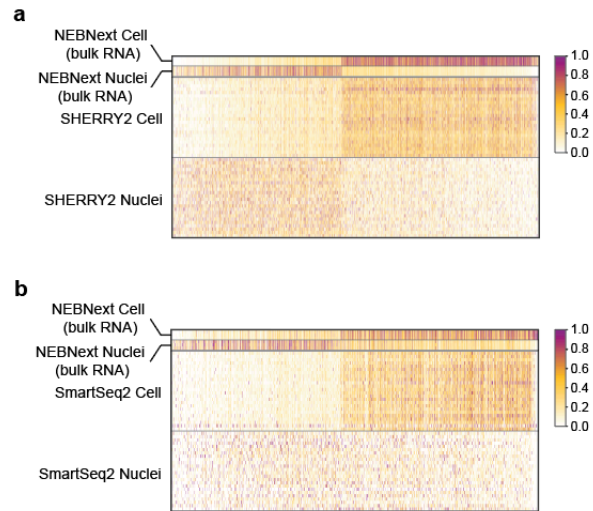

**Extended Data Fig. 5 Expression pattern of differential genes between cells and nuclei in SHERRY2.** Heatmap of the counts of differentially expressed genes between HEK293T cells and nuclei in the NEBNext, SHERRY2 (**a**) and SmartSeq2 (**b**) results. The differentially expressed genes were identified by the NEBNext method with 200-ng RNA input and sorted by log<sub>2</sub> fold-change. The inputs of SHERRY2 and SmartSeq2 were single HEK293T cells and nuclei. Each line represents a replicate.

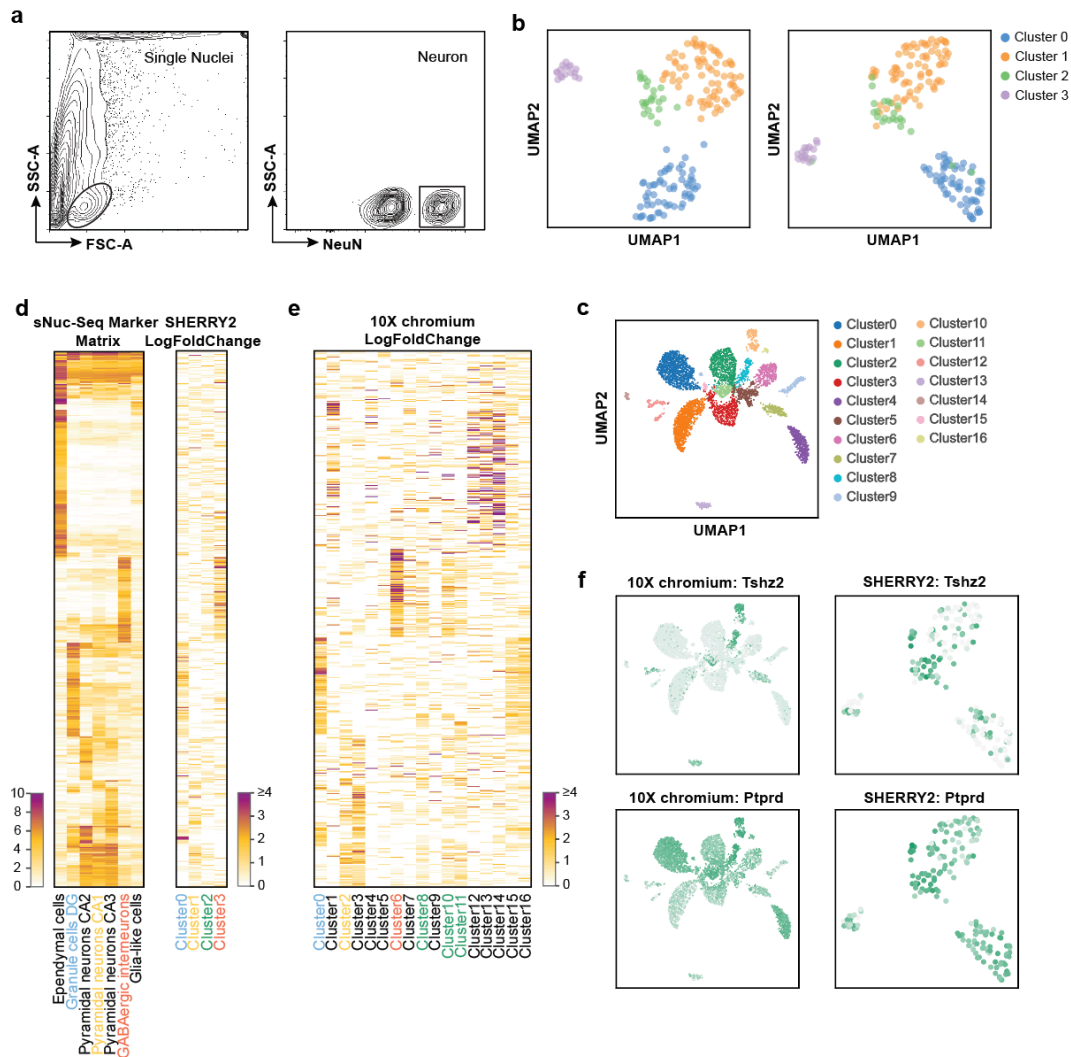

**Extended Data Fig. 6 Clustering and annotation of hippocampal nuclei.** **a**, Flow cytometry gating of single neuron nuclei that were isolated from mouse hippocampus. **b**, The left panel shows a UMAP projection of the neuron nuclei clustered using marker genes of hippocampal cell types reported by Habib, N. *et al*<sup>15</sup>. The right panel shows the nuclei positions in **Fig. 2e**, and each nucleus is colored using the same labeling scheme used in the left panel. The snRNA-seq libraries were prepared by SHERRY2. **c**, Clustering of single hippocampal nuclei visualized by UMAP plot. The libraries were prepared by 10X Chromium Single Cell 3' Reagent Kits. **d**, Heatmaps of hippocampal marker gene counts acquired from Habib, N. *et al*<sup>15</sup> and their log fold change across clusters that were identified by SHERRY2 (**Fig. 2e**). Clusters with similar gene expression patterns are labeled with the same colors. **e**, Heatmaps of gene log fold change across clusters that were identified by 10X Chromium in **c**, with the same genes and sorting order shown in **d**. Clusters that exhibited an expression pattern similar to that of Cluster 2 in **Fig. 2e** are labeled in green. **f**, Potential marker genes of Cluster 2 in **Fig. 2e** and a UMAP plot of their expression in the SHERRY2 and 10X Chromium results.



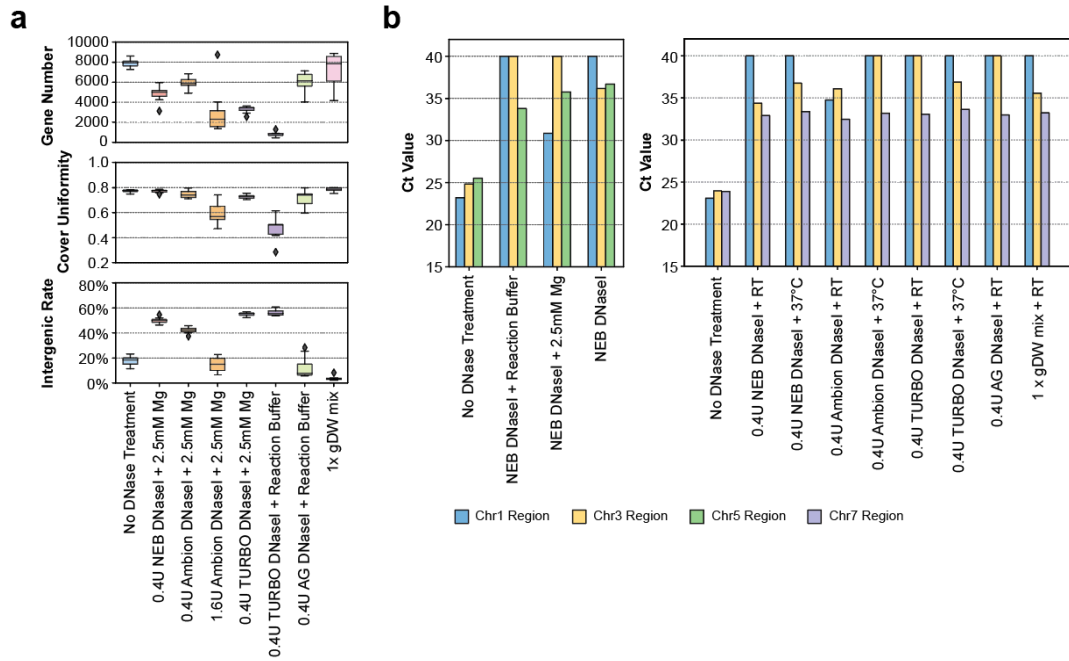

**Extended Data Fig. 7 DNase activity and performance in SHERRY2 library construction.** **a**, Library quality of SHERRY2 tested with single HEK293T cells and different DNases. The gene number (FPKM>1) at 0.25-million reads, gene body coverage uniformity and percentage of reads that were mapped to intergenic regions are shown. The x-axis labels indicate the amount of each DNase and its reaction buffer. **b**, qPCR quantification of 15-ng digested HEK293T genomic DNA by 0.4U NEB DNase I with the recommended reaction buffer, either containing 2.5 mM Mg<sup>2+</sup> or without any divalent ions. The digested products were split into three parts, and ct values were measured using primers designed for the chr1, chr3 or chr5 region. **c**, qPCR quantification of 30-ng digested HEK293T genomic DNA. The x-axis labels indicate the amounts of each DNase and the reaction temperature (RT indicates room temperature). The digestions were all performed without any added divalent ions. The digested products were split into three parts, and ct values were measured using primers designed for the chr1, chr3 or chr7 region.

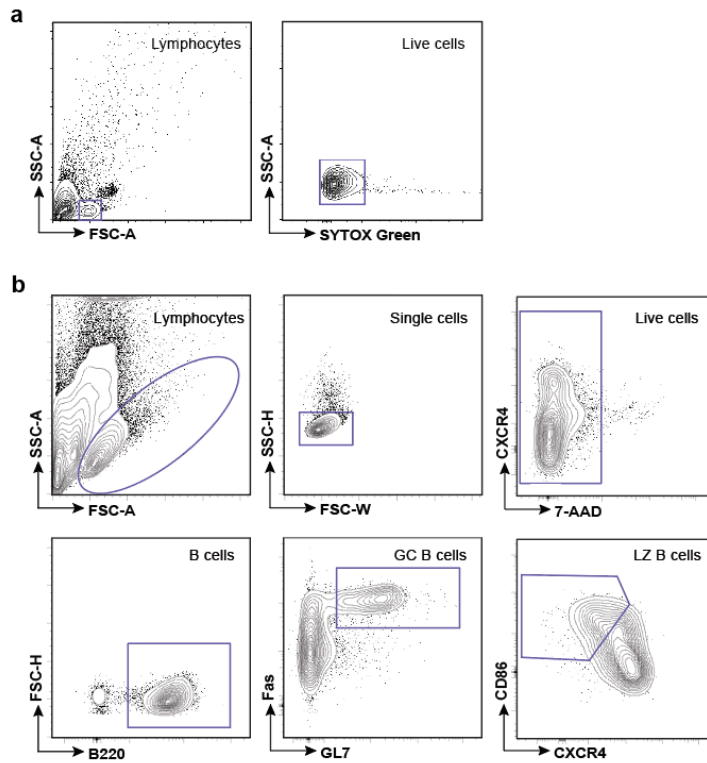

**Extended Data Fig. 8 Flow cytometry gating of single lymphocytes and single GC B cells.** Flow cytometry gating of single lymphocyte cells that were isolated from murine eyeball blood (a) and single B cells from murine GC light zones (b).

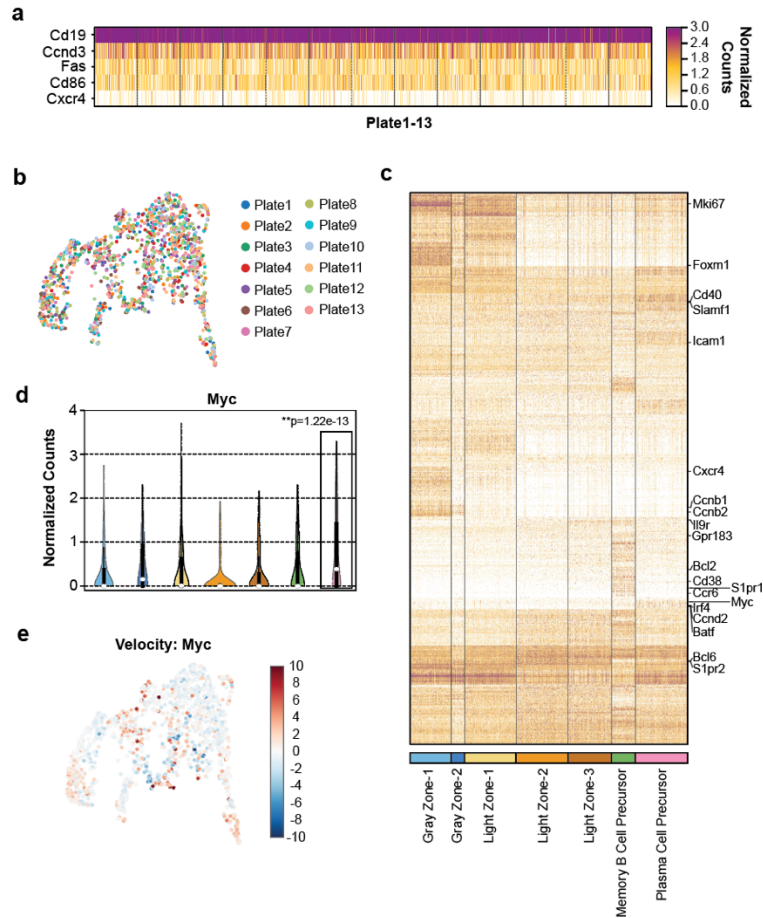

**Extended Data Fig. 9 GC information gained from SHERRY2.** **a**, Heatmap of the counts of the gating genes shown in **Extended Data Fig. 8b**, which were used to isolate single B cells from murine GC light zones. **b**, Single cells sorted in different 96-well plates were labeled with different colors on a UMAP plot showing clusters from the GC light zone in **Fig. 4a**. **c**, Up- or down-regulated genes (adjusted p-value < 1e-3, fold change > 1.5 or < 0.67) identified by SHERRY2 across GC light zone cell types. The labeled genes were previously reported for the cell types. **d**, Violin plot of gene *Myc* counts within each GC light zone cell type. The colors correspond to the cell types annotated in **Fig. 4a**. The p-values between plasma cell precursors and other cell types were calculated by the Mann-Whitney-U test. **e**, RNA velocity of the *Myc* gene projected on a UMAP plot.

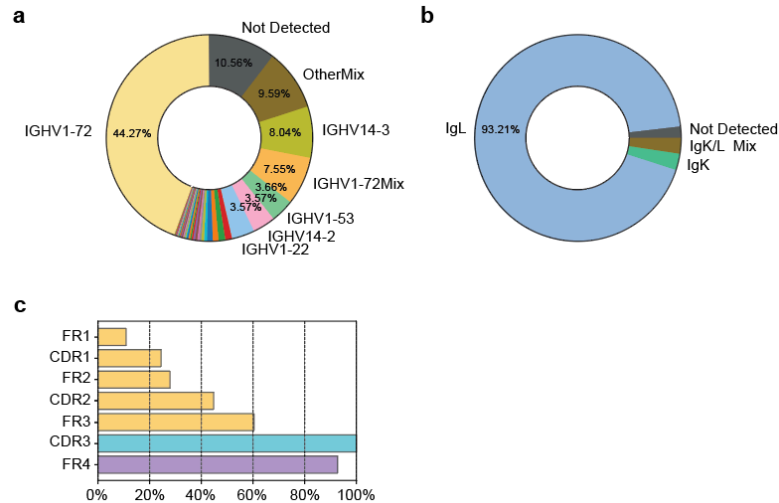

**Extended Data Fig. 10 BCR sequences of single GC B cells identified by SHERRY2.** **a**, Usage frequency of IgH variable genes that were assembled from the reads of each single GC light zone B cell. “Mix” indicates that more than 1 IgH variable gene was assigned, or more than 1 heavy chain sequence was assembled and also assigned to different genes, with a frequency less than 80%. “IGHV1-72Mix” indicates that one of the assigned genes was IGHV1-72. **b**, Usage frequency of light chain types that paired with IGHV1-72 sequences. **c**, Proportions of cells that covered different regions within IgH variable genes among cells for which IgH sequences could be assembled.
